# Supplementary material
Source: MDPI journal article supplement (https://www.mdpi.com/2075-4701/8/7/471)

**Figure S1. Severe over-melting zone.**

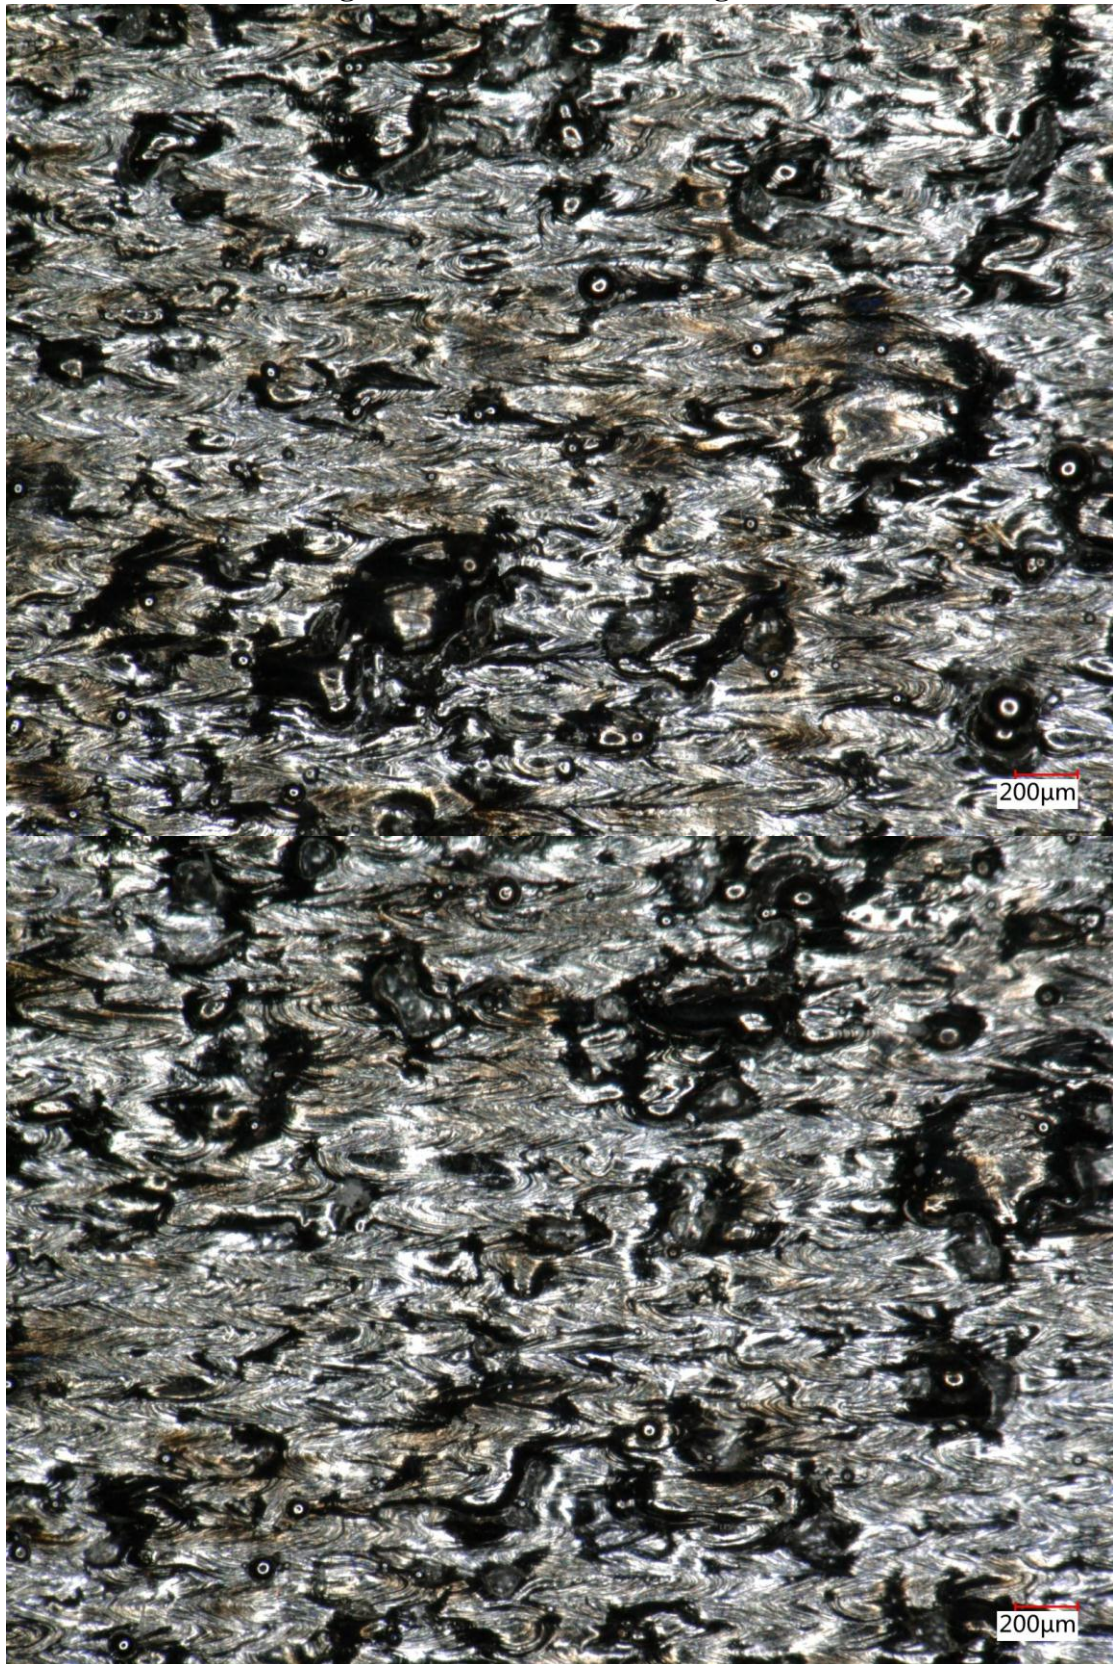



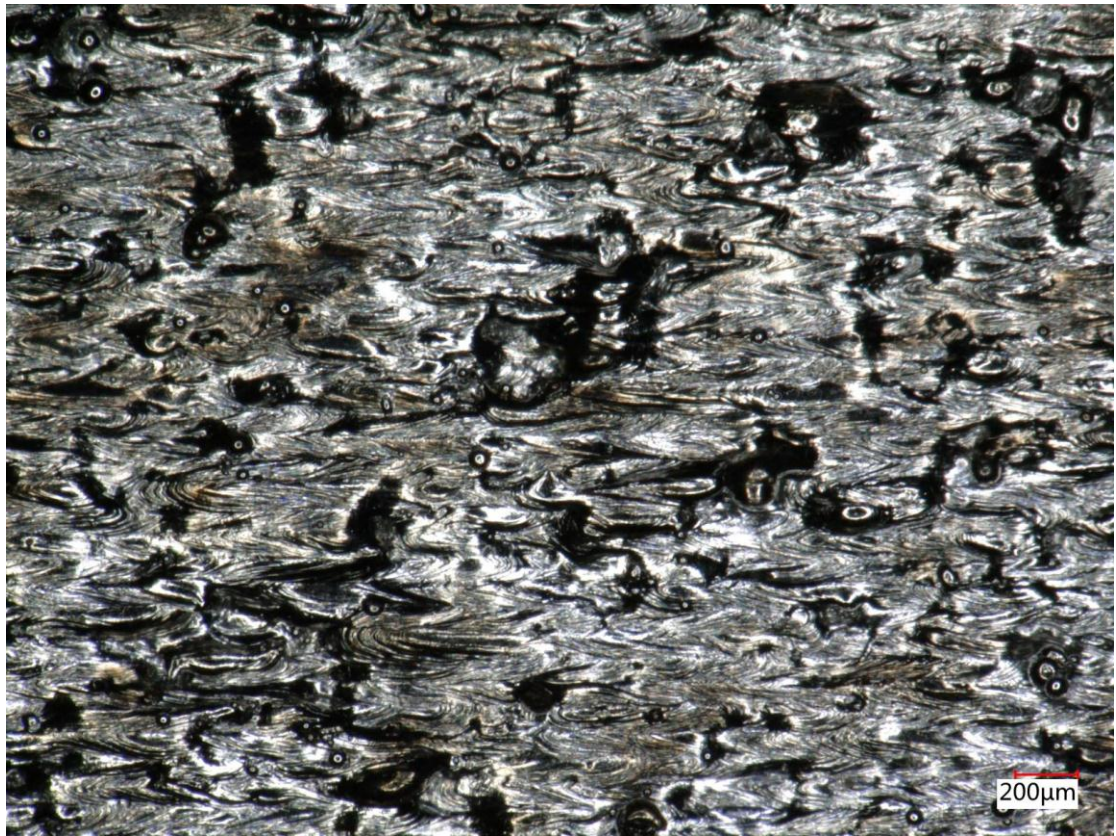



**Figure S2. High energy density nodulizing zone.**

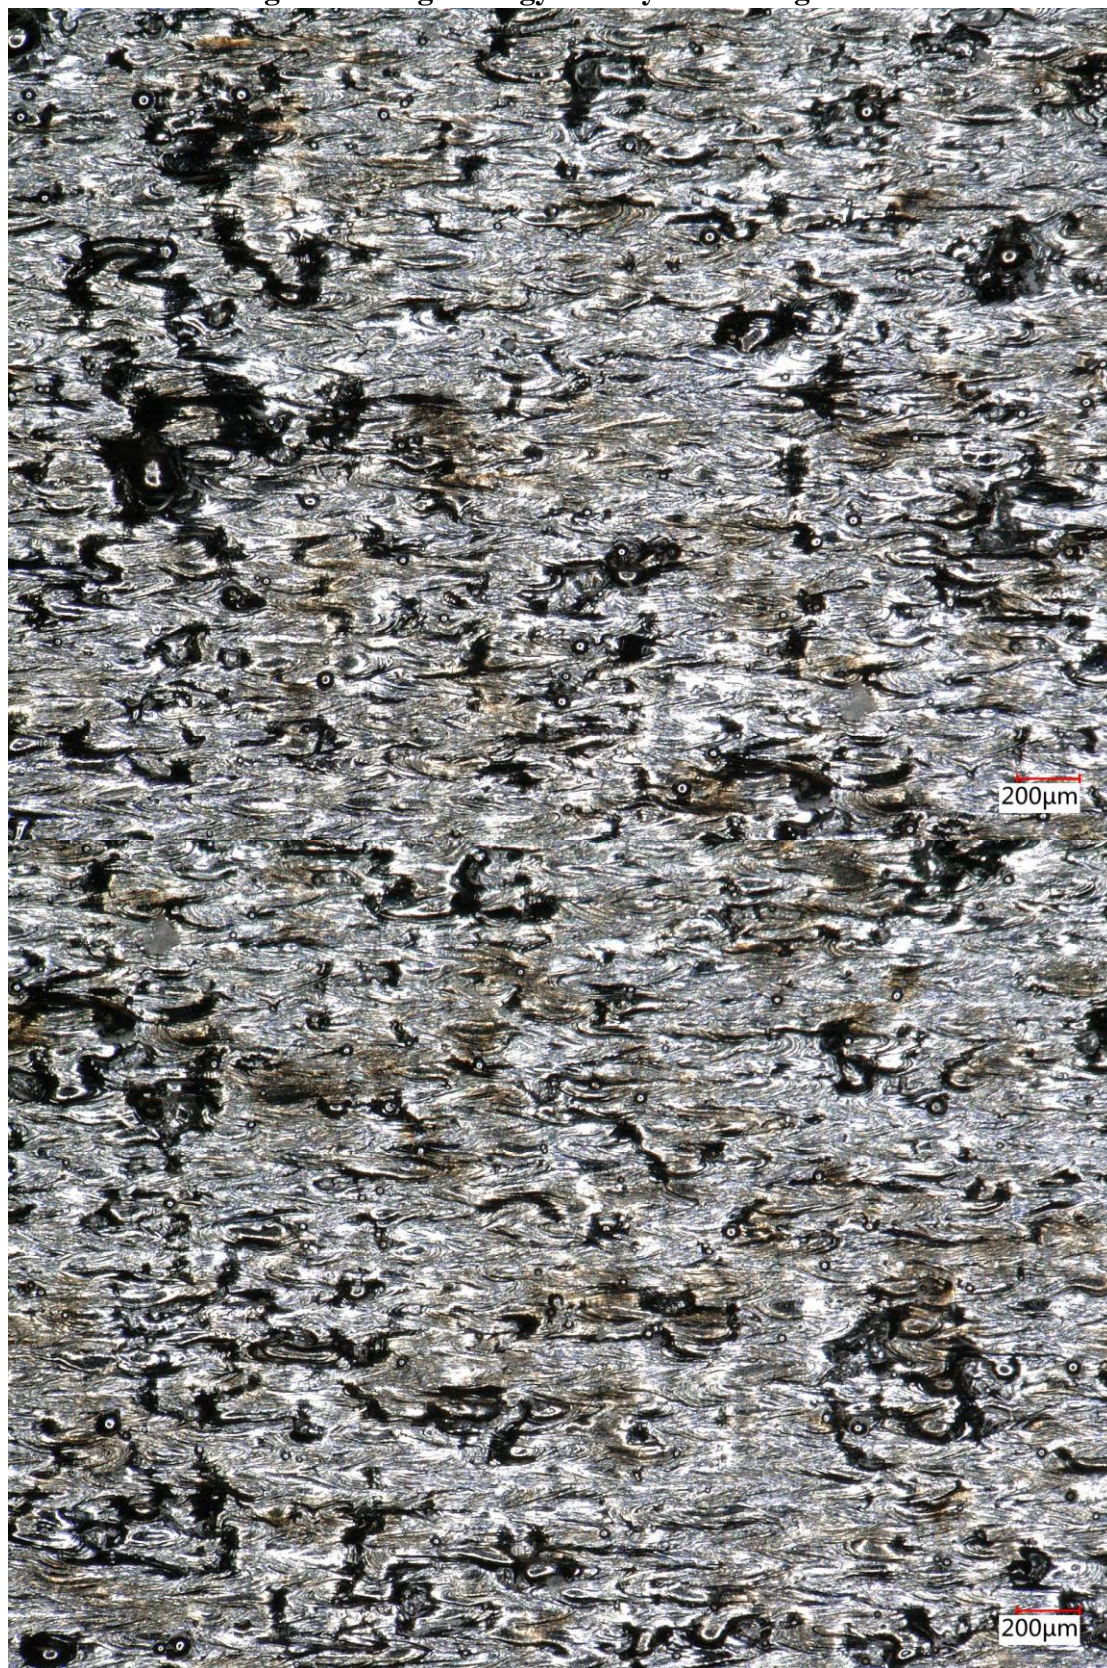



**Figure S3. Smooth forming zone.**

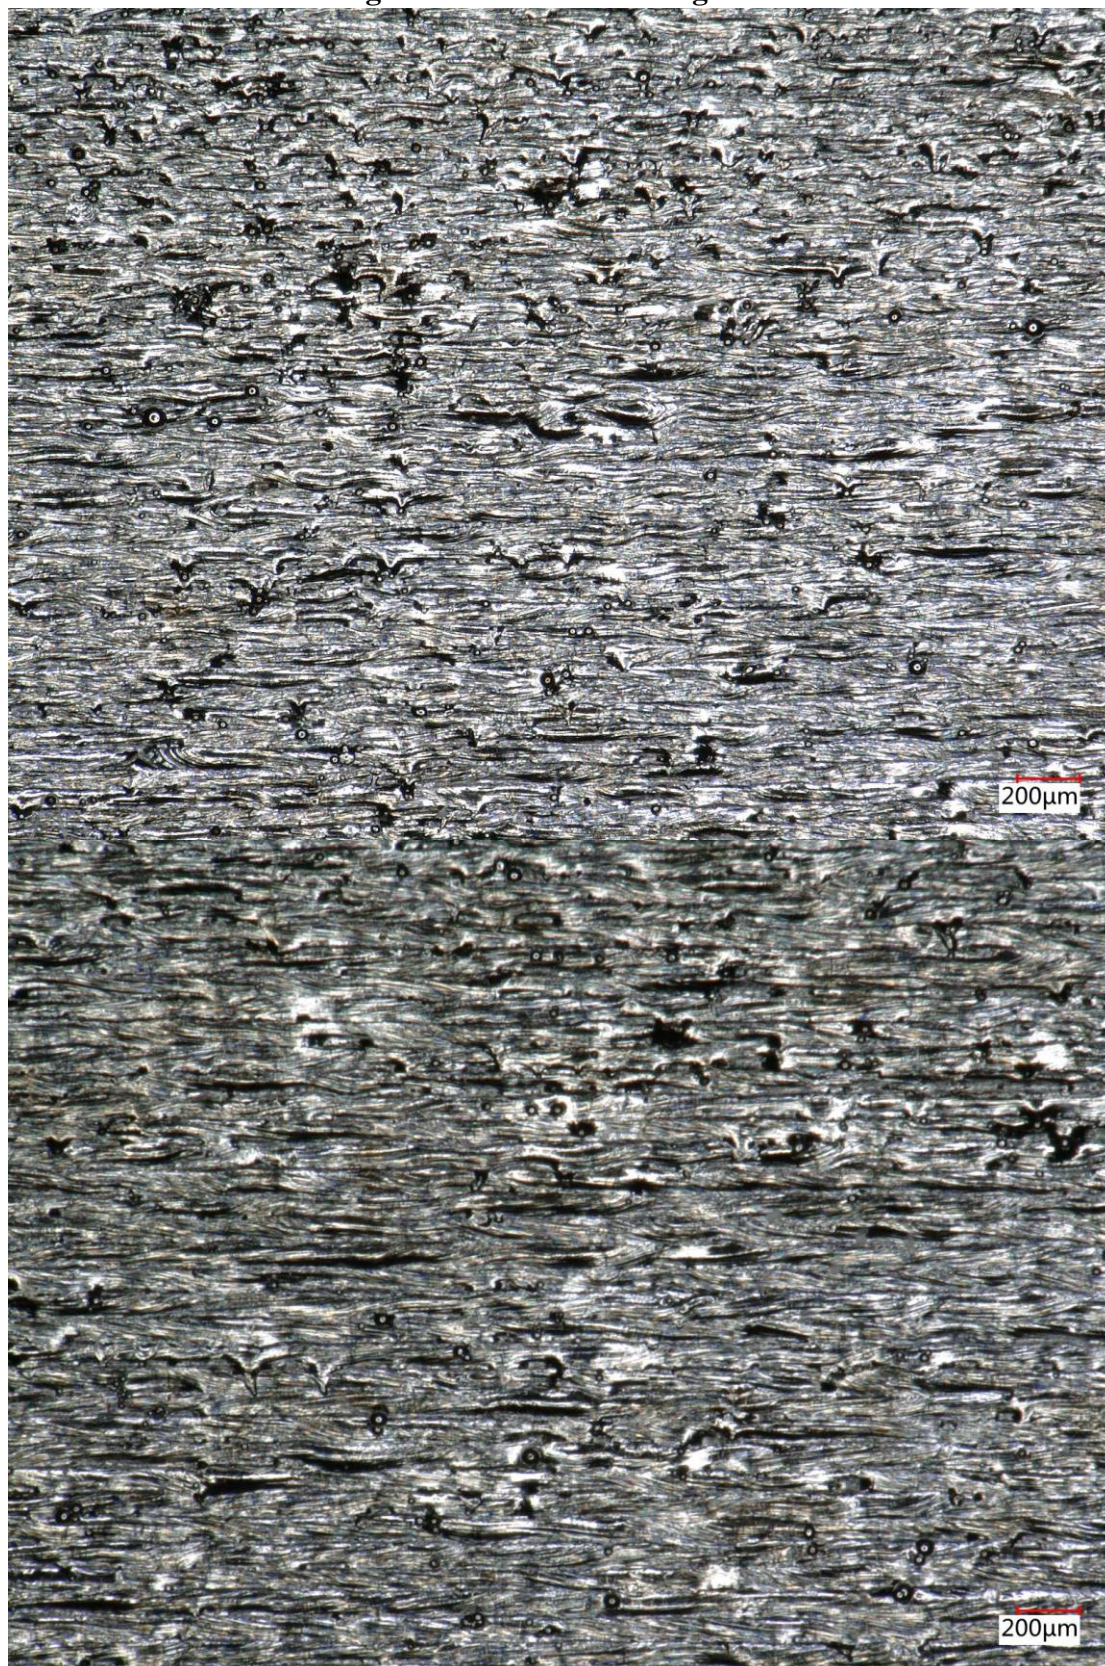



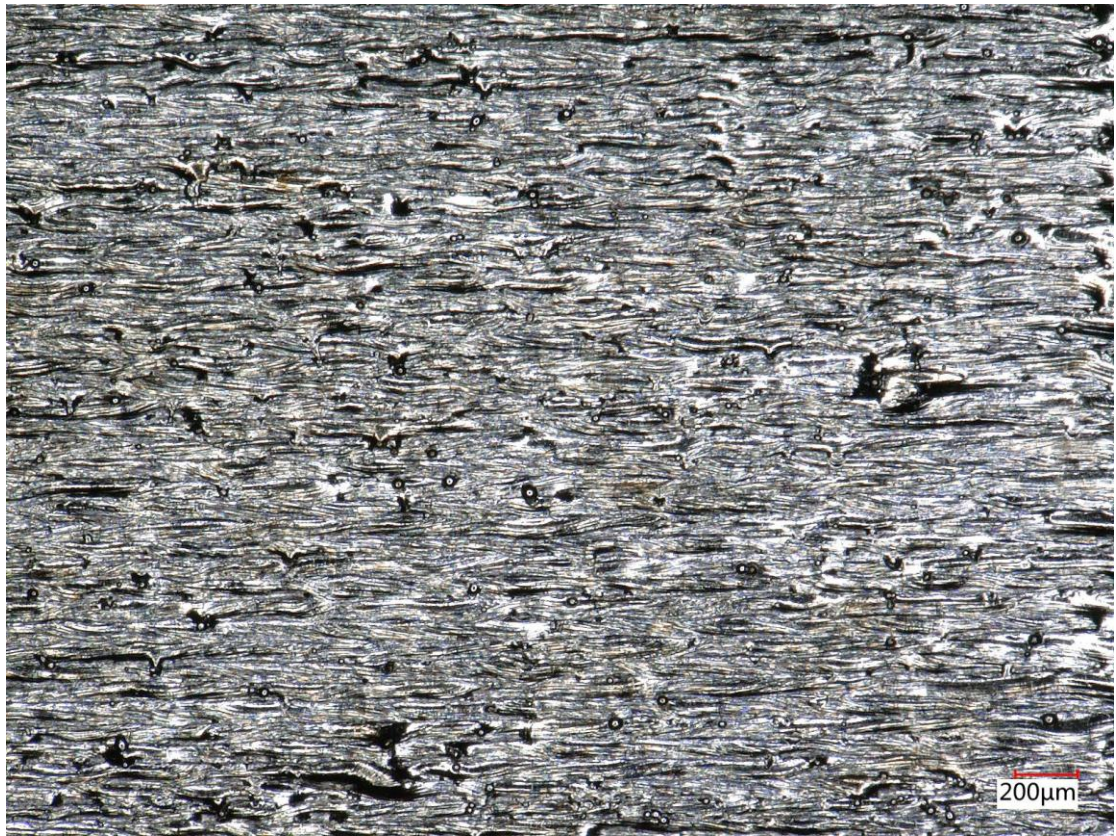



**Figure S4. Low energy density nodulizing zone.**

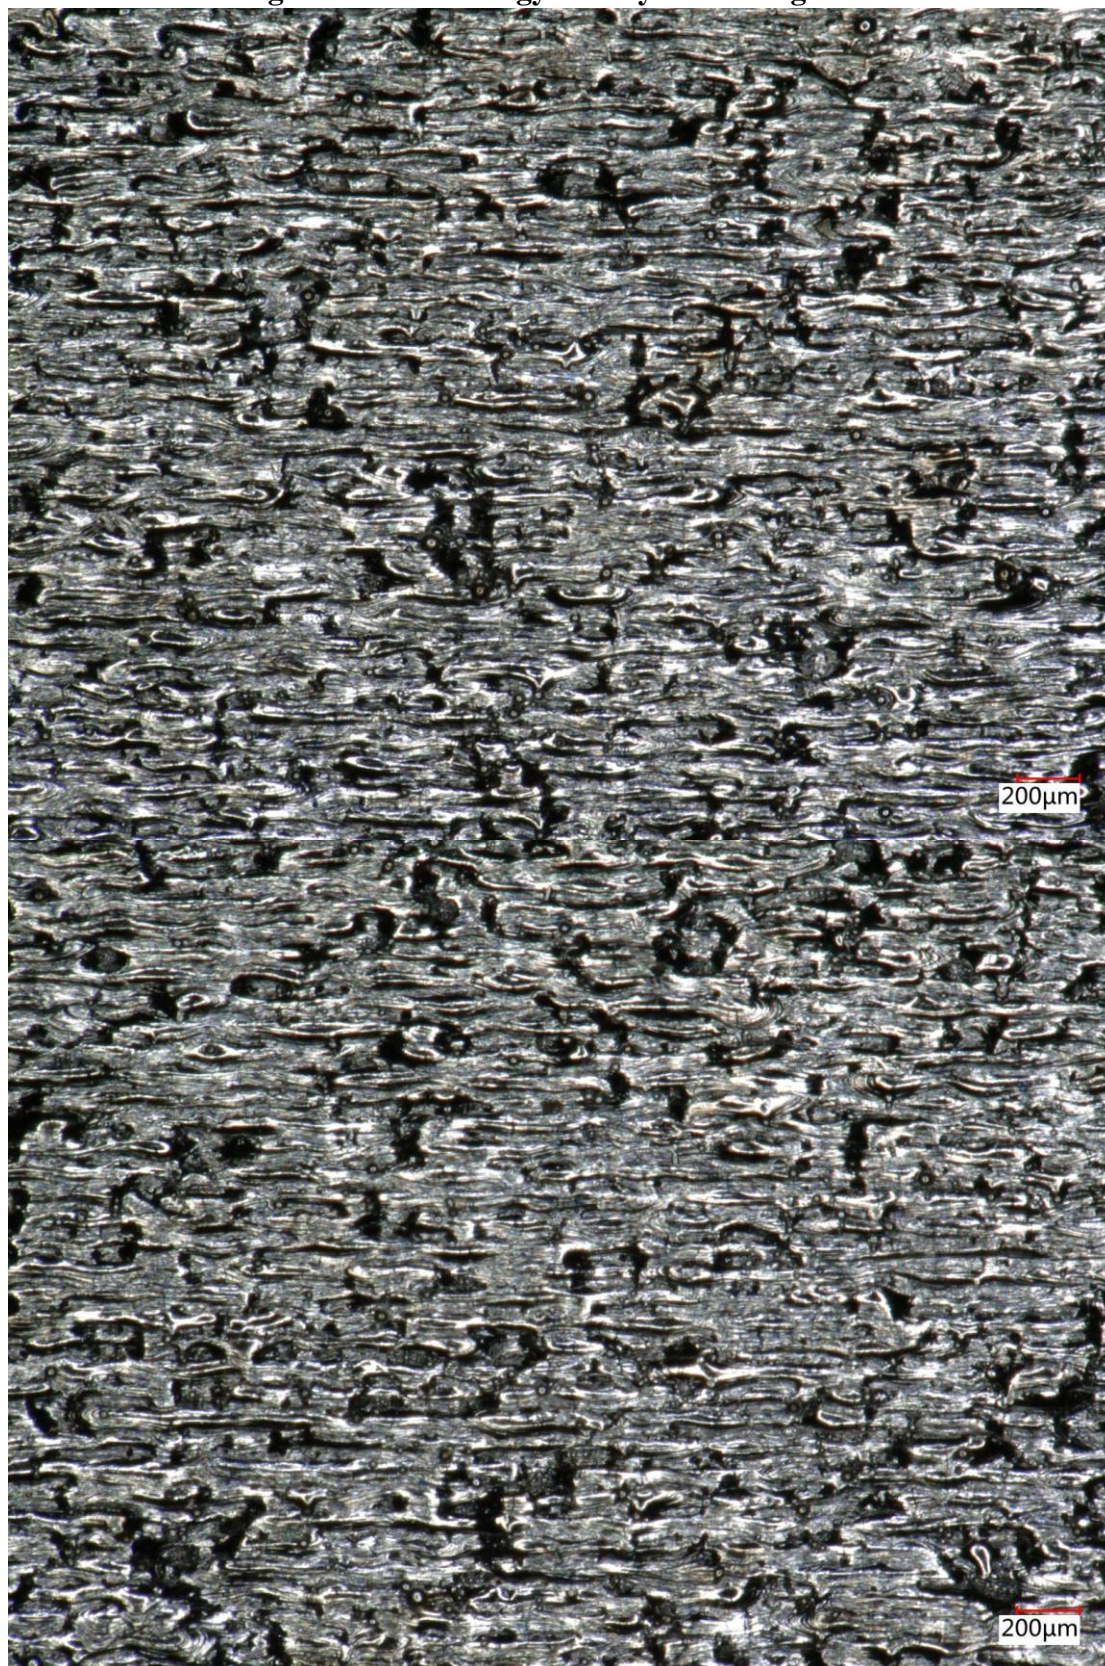



**Figure S5. Sintering zone.**

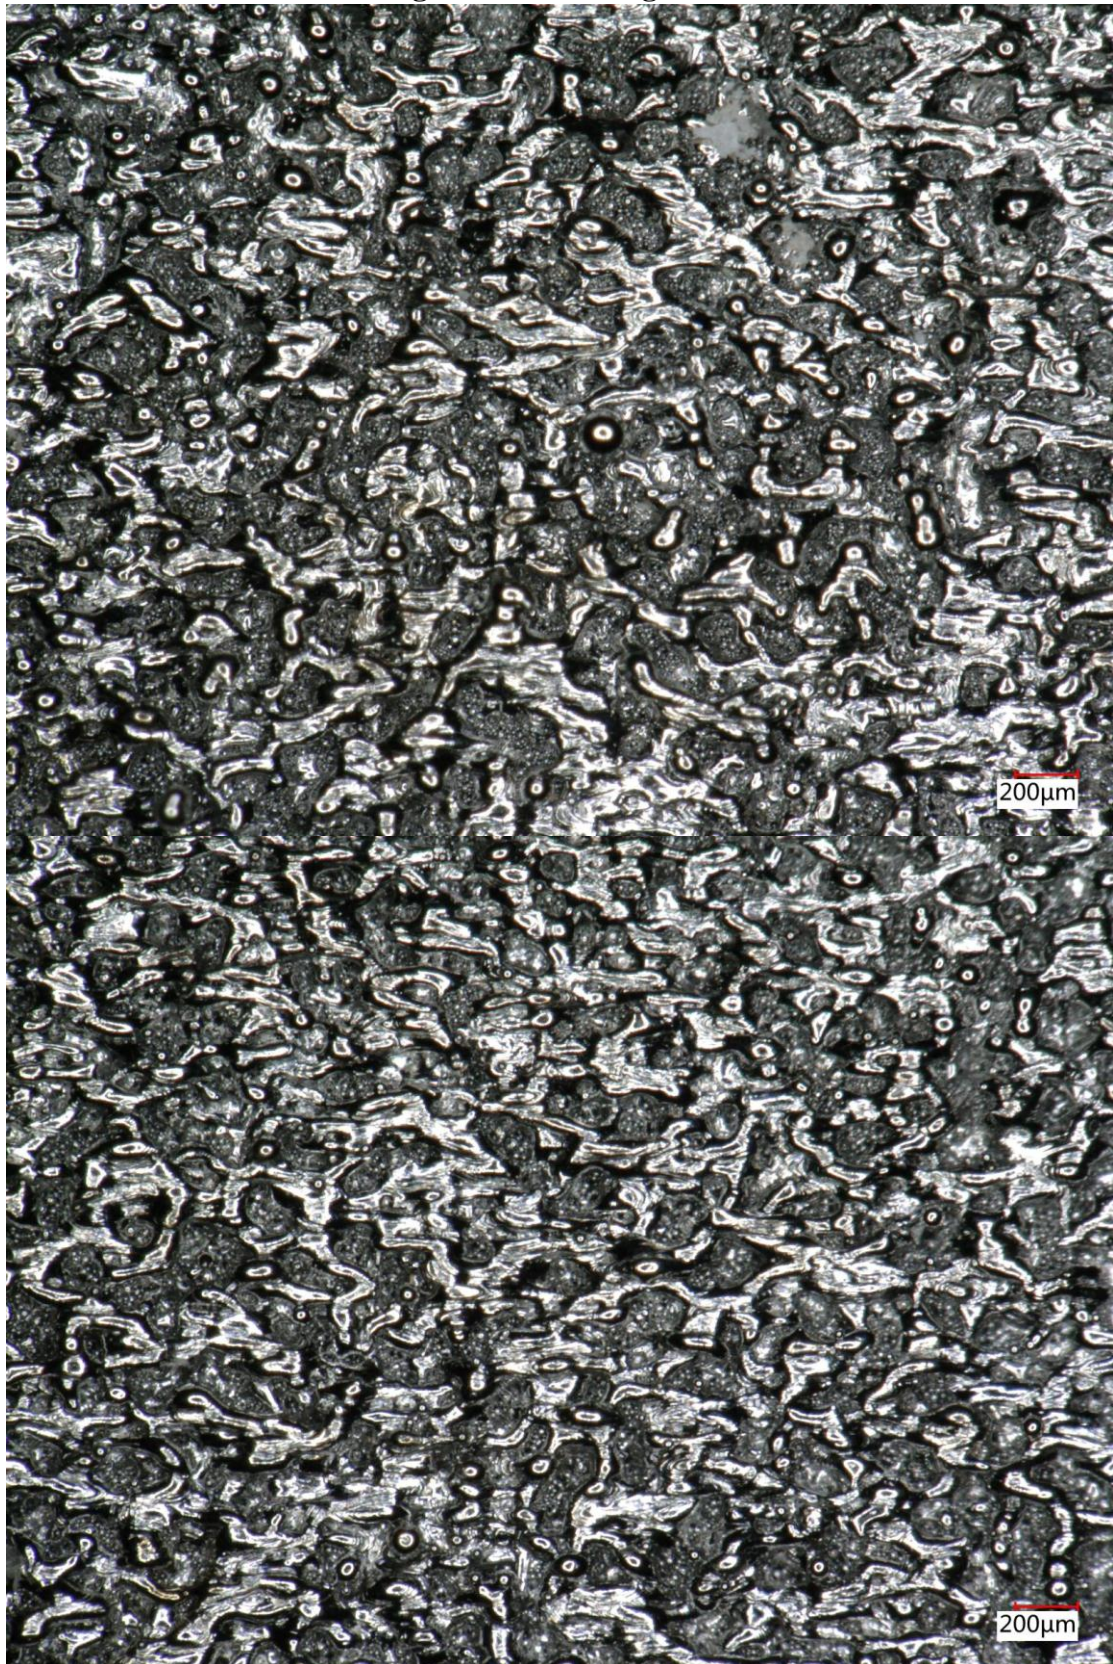



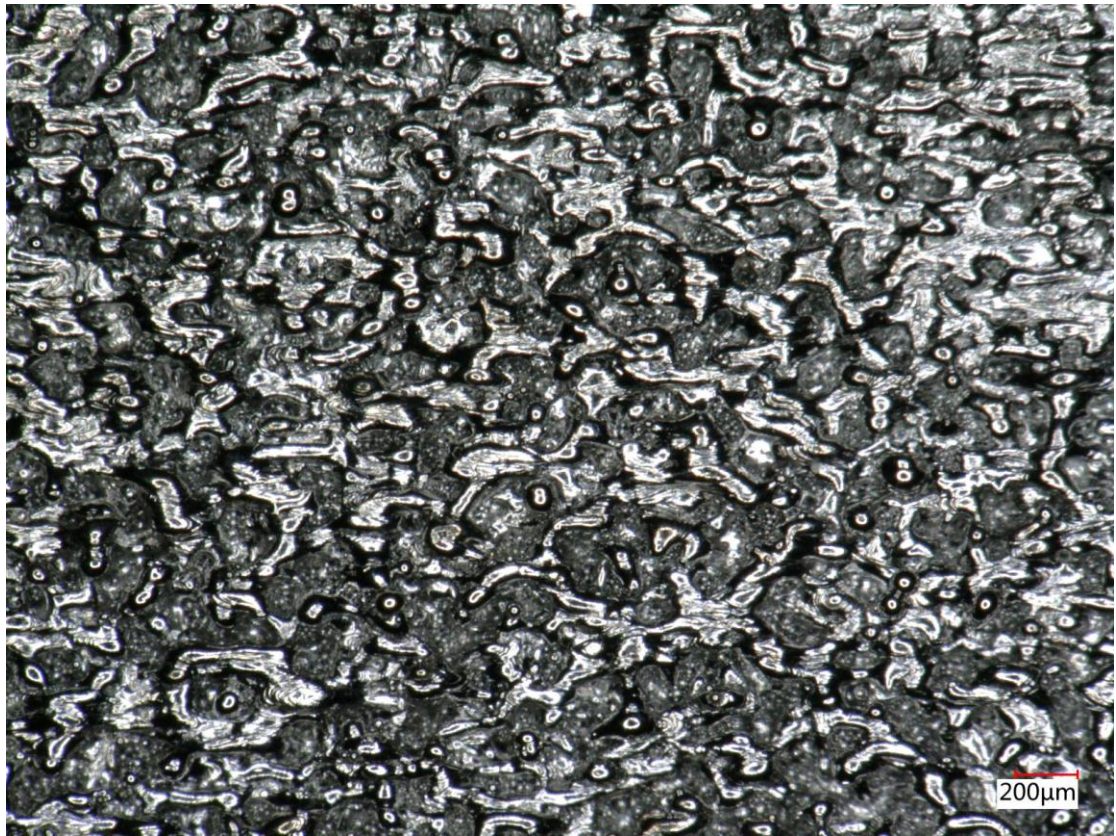

Supplement: s1 [file s1]
