# Supplementary material
Source: MDPI journal article supplement (https://www.mdpi.com/2075-4701/8/7/471)
Supplement: s1 [file s1]

**Table S1.** Composition of Ti6Al4V powder.

| Element | Composition<br>(%) | ASTMF2924<br>(%) | Element | Composition<br>(%) | ASTMF2924<br>(%) |
|---------|--------------------|------------------|---------|--------------------|------------------|
| Al      | 6.70               | 5.50-6.75        | N       | 0.03               | <0.05            |
| V       | 4.10               | 3.50-4.50        | H       | 0.01               | <0.015           |
| Fe      | 0.12               | <0.3             | Y       | 0                  | <0.005           |
| O       | 0.11               | <0.2             | Ti      | <0.08              | <0.4             |
| C       | 0.06               | <0.08            | Other   | 88.79              | remainder        |
